# Supplementary material
Source: PubMed Central journal article supplement (PMC7136912)
Supplement: ajcr0010-0884-f8.pdf [file ajcr0010-0884-f8.pdf]

## ROCK2 promotes hepatocellular carcinoma metastasis by disturbing MKP1 expression

**Table S1.** Summary of significantly differentially expressed genes in Huh7-shROCK2 compared with Huh7-shNC cells

| Gene name            | Fold change | P value |
|----------------------|-------------|---------|
| Increased expression |             |         |
| MKP1                 | 3.512       | < 0.001 |
| SHP-1                | 2.777       | 0.012   |
| SCARA5               | 2.521       | 0.013   |
| PBX1                 | 2.031       | 0.036   |
| CEBP $\alpha$        | 2.012       | 0.003   |
| GNE                  | 1.983       | 0.007   |
| C12orf45             | 1.888       | 0.012   |
| ALS2CL               | 1.783       | 0.018   |
| TLE3                 | 1.566       | 0.032   |
| ANKRD9               | 1.508       | 0.015   |
| Decreased expression |             |         |
| ATF4                 | 2.212       | 0.021   |
| MMP2                 | 2.089       | 0.002   |
| $\beta$ -catenin     | 2.043       | 0.021   |
| MMP9                 | 1.923       | 0.023   |
| MAFK                 | 1.821       | 0.013   |
| HOXB9                | 1.791       | 0.023   |
| Survivin             | 1.784       | 0.012   |
| FAM109A              | 1.744       | 0.017   |
| Cyclin D1            | 1.696       | 0.022   |
| ER $\alpha$          | 1.682       | 0.017   |

## ROCK2 promotes hepatocellular carcinoma metastasis by disturbing MKP1 expression

**Table S2.** Relationship between MKP1 expression and clinicopathological features in 132 HCC patients

| Parameters                     | Total case<br>132 | MKP1                   |                       | P value   |
|--------------------------------|-------------------|------------------------|-----------------------|-----------|
|                                |                   | High expression (N=50) | Low expression (N=82) |           |
| Age (years)                    |                   |                        |                       | P=0.903   |
| < 60                           | 77                | 30                     | 47                    |           |
| ≥60                            | 55                | 20                     | 35                    |           |
| Gender                         |                   |                        |                       | P=0.796   |
| Female                         | 56                | 20                     | 36                    |           |
| Male                           | 76                | 30                     | 46                    |           |
| Tumor size (cm)                |                   |                        |                       | P=0.858   |
| < 5                            | 66                | 25                     | 41                    |           |
| ≥5                             | 66                | 25                     | 41                    |           |
| HBsAg                          |                   |                        |                       | P=0.422   |
| Negative                       | 60                | 20                     | 40                    |           |
| Positive                       | 72                | 30                     | 42                    |           |
| AFP (ng/ml)                    |                   |                        |                       | P=0.969   |
| < 400                          | 20                | 8                      | 12                    |           |
| ≥400                           | 112               | 42                     | 70                    |           |
| TNM                            |                   |                        |                       | P=0.942   |
| I/II                           | 80                | 30                     | 50                    |           |
| III/IV                         | 52                | 20                     | 32                    |           |
| Venous invasion                |                   |                        |                       | P < 0.001 |
| Absent                         | 70                | 10                     | 60                    |           |
| Present                        | 62                | 40                     | 22                    |           |
| Tumor microsatellite formation |                   |                        |                       | P=0.017   |
| Absent                         | 69                | 19                     | 50                    |           |
| Present                        | 63                | 31                     | 32                    |           |

HR, hazard ratio; CI, confidence interval.

**Table S3.** Univariate and multivariate analyses of overall survival in HCC patients

| Parameters                                      | Univariate analysis |             |         | Multivariate analysis |             |         |
|-------------------------------------------------|---------------------|-------------|---------|-----------------------|-------------|---------|
|                                                 | HR                  | 95% CI      | P value | HR                    | 95% CI      | P value |
| Age (≥60/< 60)                                  | 0.671               | 0.422-1.784 | 0.554   | -                     | -           | -       |
| Gender (Male/Female)                            | 1.543               | 0.734-2.356 | 0.843   | -                     | -           | -       |
| Tumor size (< 5/≥5)                             | 1.231               | 0.652-2.131 | 0.732   | -                     | -           | -       |
| HBsAg (Negative/Positive)                       | 0.769               | 0.521-1.853 | 0.698   | -                     | -           | -       |
| AFP (ng/ml) (< 400/≥400)                        | 1.621               | 0.745-2.891 | 0.864   | -                     | -           | -       |
| TNM (I, II/III, IV)                             | 0.975               | 0.731-2.758 | 0.688   | -                     | -           | -       |
| Venous invasion (Absent/Present)                | 1.565               | 1.626-4.533 | 0.017   | 1.136                 | 1.076-2.652 | 0.037   |
| Tumor microsatellite formation (Absent/Present) | 2.334               | 1.664-5.612 | 0.014   | 1.363                 | 1.274-3.621 | 0.026   |
| MKP1 expression (Low/High)                      | 2.642               | 1.734-6.113 | 0.005   | 1.890                 | 1.343-4.791 | 0.025   |

# ROCK2 promotes hepatocellular carcinoma metastasis by disturbing MKP1 expression

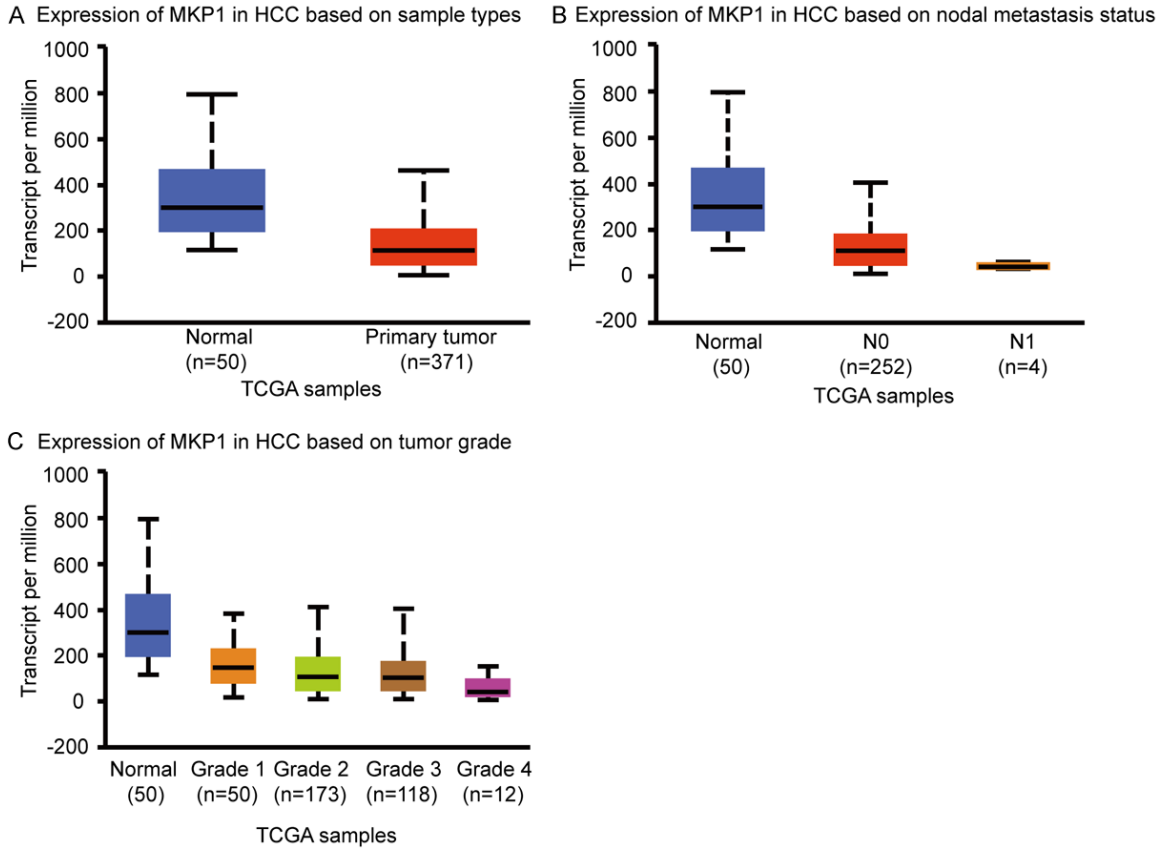

**Figure S1.** The expression of MKP1 was decreased in HCC tissues. A. Expression of MKP1 was decreased in HCC tissues based on sample type. B. Expression of MKP1 was decreased in HCC tissues based on nodal metastasis statuses. C. Expression of MKP1 was decreased in HCC tissues based on tumor grade.

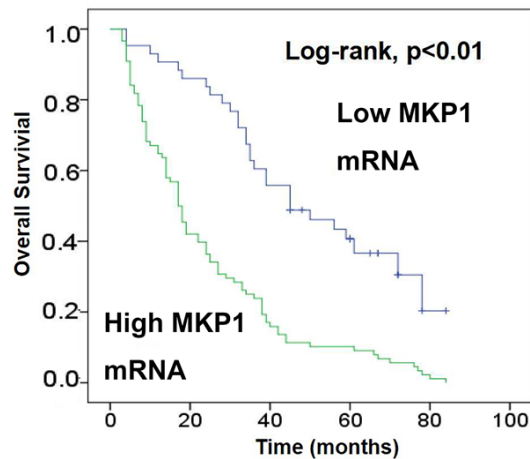

**Figure S2.** The high mRNA expression of MKP1 was associated with poor outcome of HCC patients. Kaplan-Meier survival curve of 132 patients with HCC (\* $P < 0.01$ , logarithmic rank test).
